# Supplementary material
Source: MDPI journal article supplement (https://www.mdpi.com/2673-6497/2/4/25)
Supplement: s1 [file s1 › solids-1458255-supplementary.pdf]

**Development of Ti PVD films to limit the carburizing of metal powders during SPS process.**

**Supplementary material**

M. R. Ardigo-Besnard<sup>a</sup>, A. Besnard<sup>b</sup>, M. Moser<sup>a</sup>, F. Bussière<sup>a</sup>

<sup>a</sup>*Laboratoire Interdisciplinaire Carnot de Bourgogne (ICB), UMR 6303 CNRS, Univ. Bourgogne Franche-Comté, BP 47870, 21078 DIJON Cedex, France*

<sup>b</sup>*Arts et Metiers Institute of Technology, LaBoMaP, Université Bourgogne Franche-Comté, HESAM Université, 71250 Cluny, France*

S1: characterization of the carburized zone after 10 min SPS at 1200°C under 50 MPa of (a) an austenitic and (b) a duplex stainless steel.

S2: surface morphologies of the Ti coatings deposited on graphite foils.

S3: EXD maps of the top surface of the sintered iron using graphite foil with a Ti coating of 1.5 µm.

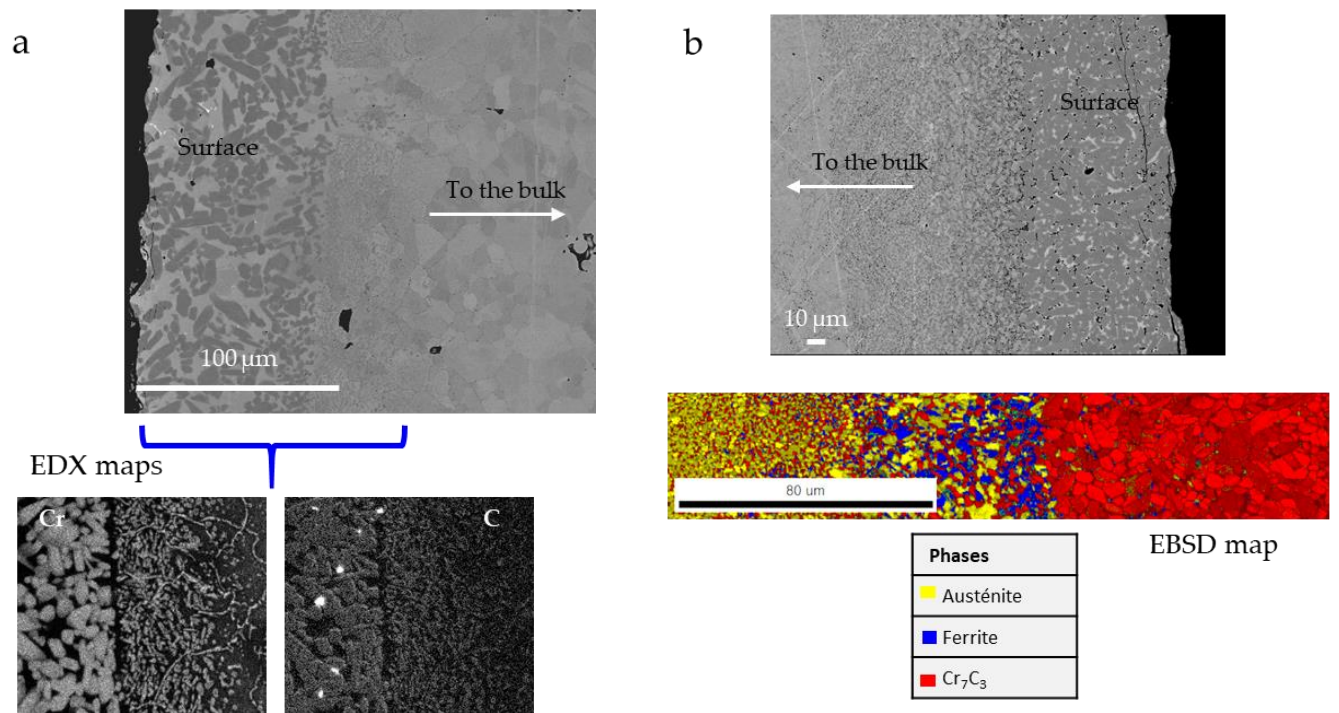

Figure S1: characterization of the carburized zone after 10 min SPS at 1200°C under 50 MPa of (a) an austenitic and (b) a duplex stainless steel.

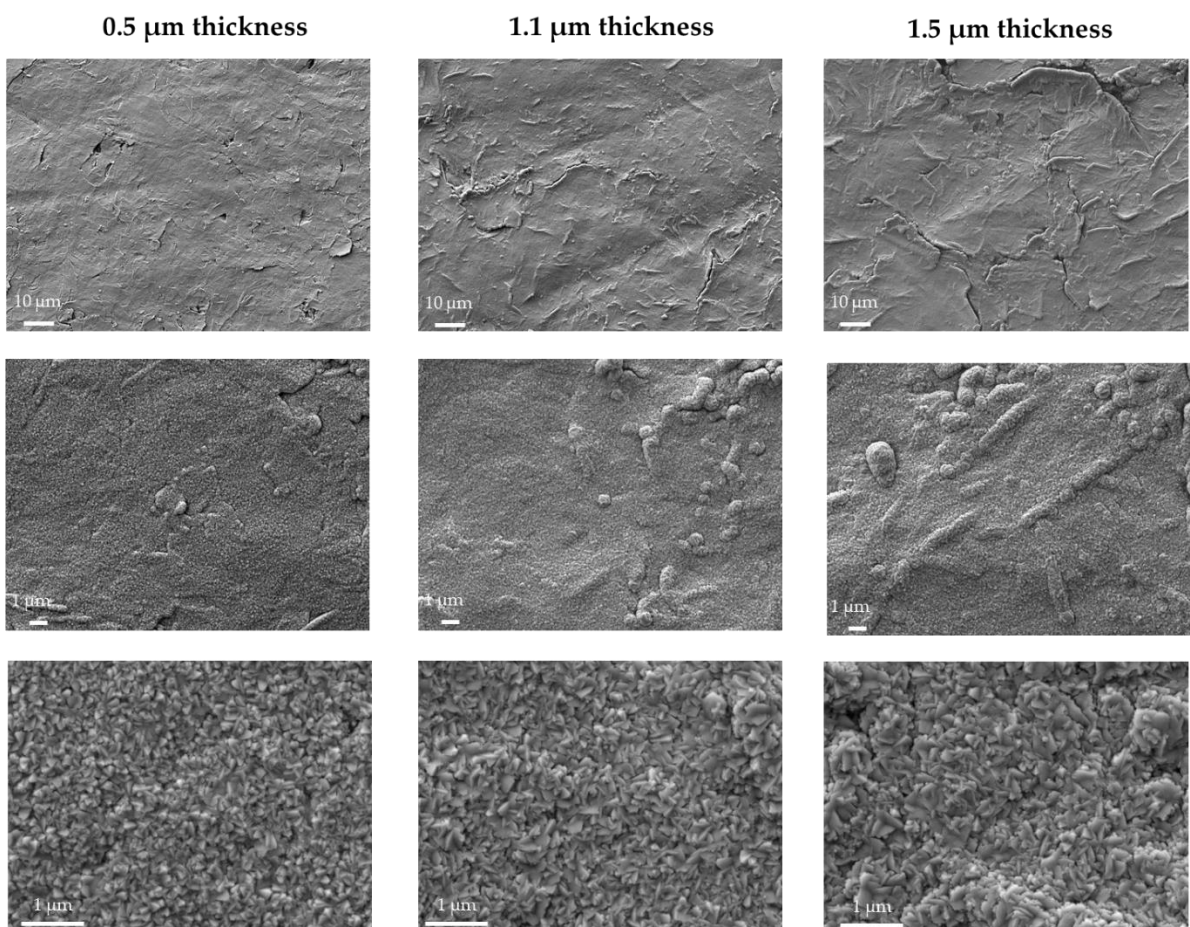

Figure S2: surface morphologies of the Ti coatings deposited on graphite foils.

Development of Ti PVD films to limit the carburizing of metal powders during SPS process.

M. R. Ardigo-Besnard, A. Besnard, M. Moser, F. Bussière

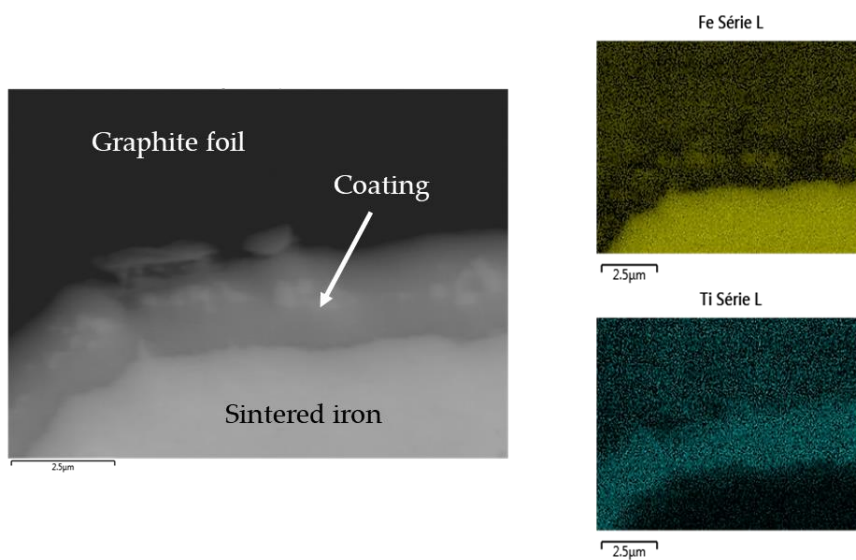

Figure S3: EDX maps of the top surface of the sintered iron using graphite foil with a Ti coating of 1.5  $\mu\text{m}$ .
